# Supplementary material for: Hexokinase 2 dimerization and interaction with voltage‐dependent anion channel promoted resistance to cell apoptosis induced by gemcitabine in pancreatic cancer
Source: PubMed Central journal article supplement (PMC6792491; doi:10.1002/cam4.2463), 2019-08-19

+Glutaraldehyde

-Glutaraldehyde

SW1990

CAPAN1

Bxpc3

SW1990

CAPAN1

Bxpc3

250

130

100

70

55

35

25

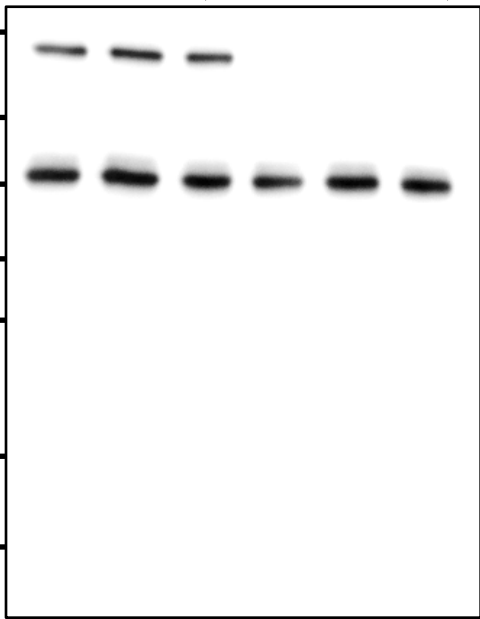

Supplement: CAM4-8-5903-s001.pdf [file CAM4-8-5903-s001.pdf]
